# Supplementary material
Source: publisher site journal article supplement (https://www.dovepress.com/article/577631)
Supplement: Supplementary file 1 [file 577631%20Supplementary%20Table%201.docx]

Supplementary Table 1. Characteristics of the reviewed studies

| **Citation** | **Objective of the study** | **Study design/ Geographically location** | **Participants** | **Data Collection Methods** | **Analysis** | **Measurements** | **Strategies** | **Types of SEN** | **Results** |
| --- | --- | --- | --- | --- | --- | --- | --- | --- | --- |
| **1. [31]** | To examine and clarify the distinct roles of teachers and teaching assistants in scaffolding learning for students with SEN to promote independence. | Quantitative research design  England | Age (9-14): Ten schools (6 primary, 4 secondary). | Data on TA-pupil interactions were taken from an extensive dataset of audio and video recordings of mathematics and literacy lessons. | Line-by-line linguistics  analysis | Socio-cultural theory, conversation analysis (CA) | Heuristic role talk | Not Specified | Teaching assistants play key scaffolding roles, supportive, corrective, and heuristic, under teacher guidance to foster autonomy and learning for students with SEN in inclusive settings. |
| **2. [76]** | To investigate the impact of augmented reality-based science instruction on learning outcomes and student perceptions among learners with specific learning difficulties. | multiple-probe design-  Turkey | 6th-grade students | Data collected by interviews, evaluations, and video recordings conducted by the authors | Data transcribing: video analyzed; content analysis methods | Interventions study, 40-minute sections | AR technology | Specific Learning Difficulties (SpLD) | Augmented reality-based science instruction significantly enhanced the academic achievement and motivation of students with specific learning difficulties, highlighting the role of innovative pedagogical support. |
| **3. [24]** | To explore how personalized instruction and the social classroom climate influence the social participation of students with and without SEN. | Survey  Austria | N=518 students in 31 grade 4 and 7 classes | Survey | MLwiN 2.36 software | Self-perceived social participation.  Social status in class. | second measurement point of the ATIS-SI study [Attitudes Towards  Inclusion of Students with disabilities related to Social Inclusion] | General SEN | Personalized instruction and a favorable social classroom climate significantly predicted greater social participation for students with SEN in inclusive classrooms. |
| **4. [54]** | To analyze the socialization challenges faced by children with SEN in inclusive settings within the Russian educational context. | Experimental design  Ukraine | N=113 children; | Experimental Group (56); control group (57). | theoretical ones: comparison, generalization, and  systematization of scientific and theoretical data | Social-pedagogical support. | Socialization of children with SEN | Visual Impairments and General SEN | Teachers identified peer rejection, lack of communication skills, and insufficient classroom adaptation as significant challenges to the social development of SEN students in inclusive settings. |
| **5. [30]** | To compare instructional practices used for students with intellectual disabilities in both mainstream and special education classrooms. | Survey study  Sweden | N=254 teachers in mainstream schools; N=392 in special education settings | Survey self-generated | Descriptive statistics; Mann-Whitney U test | Pupils’ social participation | - | Intellectual Disabilities | Instructional practices for students with intellectual disabilities varied significantly between mainstream and special settings, with inclusive classrooms relying heavily on general classroom routines rather than individualized strategies. |
| **6. [74]** | To assess how the learning of students with SEN and disabilities is evaluated in mainstream physical education settings. | Qualitative study  UK | N=39 teachers | Interview | Thematic analysis | Ableism; | Ability to educate pupils with SEND in PE | General SEN and Disabilities | Mainstream physical education teachers struggled to assess SEN students effectively, revealing gaps in pedagogical training and support that limit academic inclusion in physical education contexts. |
| **7. [73]** | To examine the socio-pedagogical challenges and support systems for children with SEN in inclusive education environments. | Quantitative study  Kazakhstan | N=320 teachers | Teacher professional competencies scale for students with SEN | SPSS; Kolmogorov–Smirnov normality test | Teacher Professional Competencies scale | Social pedagogical support. | General SEN | Socio-pedagogical support systems were found to be essential in improving the academic success and social adaptation of children with SEN, yet often remain underdeveloped in inclusive schools. |
| **8. [23]** | To explore general education teachers’ experiences and challenges in implementing inclusive practices for students with SEN. | Qualitative study  Norway | N=8 teachers | Semi-structured interviews from four schools | Thematic analysis | - | - | General SEN | Teachers reported feeling responsible but underprepared for inclusive teaching, often facing isolation and limited institutional support when working with SEN students in general education classrooms. |
| **9. [75]** | To identify key issues and challenges teachers face in the provision of special education from a qualitative perspective. | Qualitative study  Philippines | N=15 teachers | Interviews | Thematic analysis | - | Identifying individual needs can be challenging, but it is also a fulfilling experience characterized by acceptance, patience, and respect for one's rights. | General SEN | Teachers highlighted systemic challenges such as overcrowded classrooms, insufficient training, and lack of collaboration as significant barriers to effectively supporting students with SEN. |
| **10.[65]** | To examine how teachers’ attitudes, subjective norms, and perceived behavioral control (TPB predictors) influence their behavioral intentions toward including students with SEBD. | Quantitative cross-sectional; Scotland (UK). | Mainstream school elementary teachers(n=111 completed the survey) . | TPB-based questionnaire assessing attitudes, norms, perceived behavioural control, behavioural intentions + demographics. | Correlation; multiple regressions; TPB modelling. | Theory of Planned Behavior scales: Attitude, Subjective Norm, Perceived Behavioral Control, and Behavioural Intention. | Teacher belief and intention mapping; no intervention. | SEBD – Social, Emotional, and Behavioural Difficulties. | Attitudes and PBC were the strongest predictors of teachers’ intentions to include SEBD students. Internal beliefs are more influential than external norms. |
| **11.[44]** | To examine students’ perceptions of inclusion climate and report psychometric validation of the Inclusion Climate Scale (ICS). | Cross-sectional survey; Germany. | Secondary school students (approx. N ≈ 699), ages 10–17. | ICS questionnaire; demographic survey. | Psychometric validation; descriptive & inferential statistics. | Inclusion Climate Scale (ICS), including subscales for student belonging and school relational climate. | School climate assessment; no intervention. | General SEN inclusive school climate (students with and without disabilities). | ICS demonstrated strong validity; students’ sense of inclusion varied significantly between schools; relational climate strongly shapes inclusion. |
| **12.[37]** | To explore early childhood teachers’ beliefs and self-efficacy regarding inclusive education in Korea. | Cross-sectional quantitative; South Korea. | Early childhood teachers. | Self-report survey using standardized belief and efficacy scales. | Descriptive statistics; factor analysis; regression models. | Teacher Belief Scale; Teacher Efficacy Scale for inclusion. | Examination of predictors of efficacy; no intervention. | Early childhood SEN (broad inclusion categories). | Teachers showed moderate–high beliefs but lower efficacy; training and experience strongly predicted higher inclusive efficacy. |
| **13. [66]** | To develop and validate a scale capturing emotional components of teacher–student relationship quality (TSRQ) in inclusive classrooms. | Instrument development & cross-sectional validation; Switzerland. | Teachers and students from inclusive secondary schools;  N = 807 school students | TSRQ surveys with emotional relationship items. | Confirmatory factor analysis; reliability testing; psychometrics. | Teacher–Student Relationship Quality Emotional Scale. | Development of a validated tool; theoretical model testing. | Social–emotional inclusion needs; relational support for SEN students. | Emotional TSRQ is central to inclusive practice; validated scale provides a robust measurement tool for inclusive relational quality. |
| **14.[20]** | To evaluate the effect of teacher student-specific self-efficacy on students’ academic self-concept, emotional well-being, and social inclusion. | Cross-sectional quantitative; European context. | Teachers (self-efficacy data) and students (academic and social outcomes)students=576;teacher= 42. | Teacher SSE scale; student academic self-concept/emotional/social inclusion scales. | Mediation and moderation analysis; SEM; multiple regression. | Student-Specific Self-Efficacy (SSE) Scale; Student Academic Self-Concept Scale; Social Inclusion/WB scales. | Teacher behavior impact modelling; no intervention. | Academic and social SEN indicators; diverse SEN profiles. | High teacher SSE significantly improved students’ academic self-concept, emotional well-being, and social inclusion. Strong teacher-mediated effects observed. |
